# Supplementary material for: Antibody responses in Burkinabe children against P. falciparum proteins associated with reduced risk of clinical malaria
Source: Front Immunol. 2025 Feb 26;16:1521082. doi: 10.3389/fimmu.2025.1521082 (PMC11896993; doi:10.3389/fimmu.2025.1521082)
Supplement: Supplementary file 3 [file Table3.xlsx]

## Sheet: P value<0.05
Protein_id	Gene_id	Annotation	rho	95% Confidence Interval	p_value
WE14	PF3D7_1035400	merozoite surface protein 3	-0.329038	(-0.52 , -0.10)	0.00306782
#12-D6	PF3D7_0524700	mitochondrial import receptor subunit TOM22, putative	-0.308127	(-0.49 , -0.11)	0.00573425
#8-F7	PF3D7_0903200	ras-related protein RAB7	-0.305735	(-0.51 , -0.07)	0.00614285
F09-73	PF3D7_0905400	high molecular weight rhoptry protein 3	-0.301629	(-0.50 , -0.09)	0.00690407
T03B11	PF3D7_0702500	Plasmodium exported protein, unknown function	-0.30102	(-0.49 , -0.09)	0.00702394
WE87.1	PF3D7_0220000	liver stage antigen 3	-0.298468	(-0.50 , -0.07)	0.00754574
WE87.2	PF3D7_0220000	liver stage antigen 3	-0.296613	(-0.50 , -0.09)	0.00794601
#4-C5	PF3D7_1427900	leucine-rich repeat protein	-0.296568	(-0.49 , -0.07)	0.00795593
#12-G5	PF3D7_1015300	methionine aminopeptidase 1b, putative	-0.289586	(-0.48 , -0.08)	0.00963687
PfSMH03-P1	PF3D7_1335300	reticulocyte binding protein 2 homologue b	-0.288478	(-0.47 , -0.09)	0.00993049
#5-H4	PF3D7_0610100	pre-mRNA-splicing factor SLU7, putative	-0.285331	(-0.49 , -0.07)	0.0108071
WE16	PF3D7_1335100	merozoite surface protein 7	-0.285147	(-0.48 , -0.06)	0.0108603
#8-C7	PF3D7_1032900	RNA polymerase II-associated protein 1, putative	-0.283831	(-0.47 , -0.07)	0.011248
#5-B2	PF3D7_1416900	prefoldin subunit 2, putative	-0.282856	(-0.49 , -0.06)	0.0115432
T01H06	PF3D7_1443900	heat shock protein 90, putative	-0.280697	(-0.48 , -0.07)	0.0122203
PfSME04-P1	PF3D7_1345600	inner membrane complex protein	-0.279798	(-0.48 , -0.04)	0.0125125
#10-D1	PF3D7_0408900	tRNA N6-adenosine threonylcarbamoyltransferase	-0.279063	(-0.47 , -0.07)	0.0127554
#12-B5	PF3D7_0320700	signal peptidase complex subunit 2	-0.278275	(-0.48 , -0.08)	0.013021
#10-A8	PF3D7_0703600	conserved protein, unknown function	-0.277605	(-0.48 , -0.08)	0.0132501
#9-E5	PF3D7_1119100	tRNA m(1)G methyltransferase, putative	-0.276491	(-0.45 , -0.08)	0.0136392
WE27	PF3D7_0104200	StAR-related lipid transfer protein	-0.275752	(-0.47 , -0.06)	0.0139027
#5-C3	PF3D7_1104000	phenylalanine--tRNA ligase beta subunit	-0.274196	(-0.46 , -0.07)	0.0144723
#12-F4	PF3D7_0213500	tetratricopeptide repeat protein, putative	-0.272825	(-0.46 , -0.06)	0.0149903
#12-A8	PF3D7_0934700	UBX domain-containing protein, putative	-0.272756	(-0.47 , -0.05)	0.0150168
#12-H6	PF3D7_1302700	ATP-dependent RNA helicase DHR1, putative	-0.272581	(-0.46 , -0.05)	0.0150842
#5-C9	PF3D7_0423000	conserved Plasmodium protein, unknown function	-0.27172	(-0.46 , -0.06)	0.0154198
#2-D1	PF3D7_1241700	replication factor C subunit 4, putative	-0.269027	(-0.47 , -0.05)	0.0165105
#10-C3	PF3D7_0827900	protein disulfide-isomerase	-0.268294	(-0.46 , -0.07)	0.0168185
#13-D7	PF3D7_1110200	pre-mRNA-processing factor 6, putative	-0.268089	(-0.47 , -0.03)	0.0169057
WE48	PF3D7_0707300	rhoptry-associated membrane antigen	-0.26785	(-0.47 , -0.05)	0.0170076
WE18	PF3D7_1035500	merozoite surface protein 6	-0.267356	(-0.46 , -0.06)	0.0172202
#5-D11	PF3D7_1321700	splicing factor 1	-0.266866	(-0.45 , -0.05)	0.0174333
#12-E10	PF3D7_1327300	subpellicular microtubule protein 3	-0.266588	(-0.45 , -0.06)	0.0175552
#12-C9	PF3D7_1335600	WD repeat-containing protein, putative	-0.266393	(-0.47 , -0.08)	0.0176412
#12-G9	PF3D7_1214100	GPI ethanolamine phosphate transferase 3, putative	-0.264801	(-0.45 , -0.07)	0.0183563
#2-B11	PF3D7_1303400	LisH domain-containing protein, putative	-0.264698	(-0.45 , -0.05)	0.0184032
#5-E11	PF3D7_0604100	AP2 domain transcription factor	-0.263701	(-0.45 , -0.06)	0.0188647
#5-H10	PF3D7_1216200	glycerol-3-phosphate dehydrogenase [NAD(+)], putative	-0.263604	(-0.45 , -0.05)	0.0189103
#12-A2	PF3D7_1342000	40S ribosomal protein S6	-0.263403	(-0.45 , -0.07)	0.0190045
WE50.1	PF3D7_1035300	glutamate-rich protein GLURP	-0.263008	(-0.47 , -0.04)	0.019191
#8-A4	PF3D7_0807600	conserved Plasmodium protein, unknown function	-0.262897	(-0.47 , -0.03)	0.0192439
#5-A5	PF3D7_0601700	Plasmodium exported protein (PHISTa), unknown function, pseudogene	-0.262401	(-0.47 , -0.05)	0.019481
#1-D12	PF3D7_0721800	conserved Plasmodium protein, unknown function	-0.262121	(-0.47 , -0.04)	0.0196161
#12-C8	PF3D7_0213400	protein kinase 7	-0.262012	(-0.47 , -0.03)	0.0196692
T03D07	PF3D7_0717900	thioredoxin-like protein	-0.261394	(-0.45 , -0.04)	0.0199706
#5-F11	PF3D7_1409400	conserved protein, unknown function	-0.259669	(-0.46 , -0.03)	0.0208331
#12-D11	PF3D7_1236400	conserved Plasmodium protein, unknown function	-0.257017	(-0.43 , -0.06)	0.0222214
WE89	PF3D7_0424200	reticulocyte binding protein homologue 4	-0.25687	(-0.45 , -0.05)	0.0223008
#5-H6	PF3D7_0619500	acyl-CoA synthetase	-0.256465	(-0.45 , -0.06)	0.0225199
#12-E5	PF3D7_1412100	mini-chromosome maintenance complex-binding protein	-0.256302	(-0.44 , -0.04)	0.0226091
TBV_1	PF3D7_0209000	6-cysteine protein P230	-0.256201	(-0.45 , -0.04)	0.022664
#9-E12	PF3D7_0610900	transcription elongation factor SPT5, putative	-0.256035	(-0.47 , -0.05)	0.0227548
WE64	PF3D7_0317100	6-cysteine protein B9	-0.254357	(-0.45 , -0.05)	0.0236922
TBV_7	PF3D7_0209000	6-cysteine protein P230	-0.254251	(-0.45 , -0.05)	0.0237524
#10-A7	PF3D7_1122400	conserved Plasmodium protein, unknown function	-0.25398	(-0.44 , -0.04)	0.0239071
#10-C1	PF3D7_1446700	apicomplexan kinetochore protein 4, putative	-0.253627	(-0.46 , -0.04)	0.0241101
#5-D6	PF3D7_1357100	elongation factor 1-alpha	-0.252981	(-0.44 , -0.07)	0.0244849
#5-F9	PF3D7_0623500	superoxide dismutase [Fe]	-0.252956	(-0.44 , -0.05)	0.0244999
TBV_1-2	PF3D7_0209000	6-cysteine protein P230	-0.252477	(-0.44 , -0.05)	0.024781
#12-E8	PF3D7_0208200	KRR1 small subunit processome component, putative	-0.252222	(-0.44 , -0.06)	0.0249323
WE91.2	PF3D7_0715200	conserved Plasmodium protein, unknown function	-0.252007	(-0.45 , -0.04)	0.02506
#5-G12	PF3D7_1231100	ras-related protein Rab-2	-0.251935	(-0.45 , -0.05)	0.0251028
#12-H7	PF3D7_1248900	26S protease regulatory subunit 8, putative	-0.251276	(-0.46 , -0.05)	0.0254987
#12-H8	PF3D7_0319400	kinesin-8X	-0.251258	(-0.46 , -0.05)	0.0255098
#10-G8	PF3D7_1349200	glutamate--tRNA ligase	-0.250801	(-0.44 , -0.06)	0.0257874
#5-D3	PF3D7_0700800	Pfmc-2TM Maurer's cleft two transmembrane protein	-0.25071	(-0.42 , -0.05)	0.0258432
#12-D7	PF3D7_1413800	diphthamide biosynthesis protein 1, putative	-0.250586	(-0.44 , -0.04)	0.025919
#5-A4	PF3D7_0824800	conserved Plasmodium membrane protein, unknown function	-0.249839	(-0.43 , -0.04)	0.0263806
WE63	PF3D7_1436300	translocon component PTEX150	-0.249268	(-0.44 , -0.03)	0.0267381
#5-A2	PF3D7_0926900	replication termination factor, putative	-0.248791	(-0.45 , -0.04)	0.0270396
#2-D3	PF3D7_1307200	DnaJ protein, putative	-0.248741	(-0.44 , -0.03)	0.0270717
#10-G5	PF3D7_1027800	60S ribosomal protein L3	-0.248675	(-0.44 , -0.02)	0.0271133
#2-B10	PF3D7_1232400	CWC16 domain-containing protein, putative	-0.248504	(-0.43 , -0.04)	0.0272226
#5-C1	PF3D7_0104300	ubiquitin carboxyl-terminal hydrolase 1, putative	-0.248353	(-0.45 , -0.04)	0.0273195
#10-E6	PF3D7_0805000	alpha/beta hydrolase, putative	-0.24792	(-0.45 , -0.05)	0.027598
#10-D8	PF3D7_0704600	HECT-type E3 ubiquitin ligase UT	-0.247434	(-0.43 , -0.05)	0.0279136
#2-G9	PF3D7_1424400	60S ribosomal protein L7-3, putative	-0.246939	(-0.44 , -0.02)	0.0282386
#5-H11	PF3D7_0711500	regulator of chromosome condensation, putative	-0.246696	(-0.45 , -0.02)	0.0283993
T03E11	PF3D7_0616200	kinetochore protein NDC80	-0.246129	(-0.44 , -0.02)	0.0287772
#5-B3	PF3D7_1023300	conserved protein, unknown function	-0.245845	(-0.44 , -0.03)	0.0289679
#10-B11	PF3D7_0106500	conserved Plasmodium protein, unknown function	-0.245819	(-0.44 , -0.05)	0.0289854
#12-F5	PF3D7_1004600	conserved Plasmodium membrane protein, unknown function	-0.245788	(-0.44 , -0.06)	0.029006
#10-F9	PF3D7_0415200	conserved Plasmodium protein, unknown function	-0.24577	(-0.46 , -0.03)	0.0290182
#10-F1	PF3D7_0820000	Snf2-related CBP activator, putative	-0.245612	(-0.45 , -0.04)	0.0291252
#13-H11	PF3D7_1227400	conserved Plasmodium protein, unknown function	-0.24549	(-0.44 , -0.04)	0.0292078
#12-A10	PF3D7_1203700	nucleosome assembly protein	-0.245356	(-0.44 , -0.02)	0.0292988
#8-G9	PF3D7_1141400	phosphatidylinositol N-acetylglucosaminyltransferase subunit H, putative	-0.245204	(-0.43 , -0.02)	0.0294026
#10-A3	PF3D7_1421900	copper transporter, putative	-0.244831	(-0.42 , -0.04)	0.0296575
#12-H9	PF3D7_1026300	conserved Plasmodium protein, unknown function	-0.244621	(-0.46 , -0.02)	0.0298022
#4-C6	PF13_0074	surface-associated interspersed protein 13.1 (SURFIN 13.1), pseudogene	-0.244223	(-0.45 , -0.02)	0.0300779
WE75.1	PF3D7_1320000	golgi protein 1	-0.244217	(-0.46 , -0.02)	0.0300822
#5-A7	PF3D7_1450000	serine/threonine protein kinase, putative	-0.243786	(-0.43 , -0.05)	0.0303832
T03F06	PF3D7_0934000	histidine--tRNA ligase, putative	-0.243531	(-0.44 , -0.04)	0.0305624
T03H07	PF3D7_1249300	protein phosphatase PPM4, putative	-0.243416	(-0.44 , -0.03)	0.0306434
Pfs230C	PF3D7_0209000	6-cysteine protein P230	-0.243148	(-0.45 , -0.04)	0.0308334
#2-A10	PF3D7_0929000	transcription initiation factor TFIID subunit 7, putative	-0.242974	(-0.45 , -0.03)	0.030957
TBV_11-14	PF3D7_0209000	6-cysteine protein P230	-0.241967	(-0.44 , -0.02)	0.0316814
TBV_15	PF3D7_0209000	6-cysteine protein P230	-0.24154	(-0.43 , -0.02)	0.0319933
AP6(GARP)	PF3D7_0113000	glutamic acid-rich protein GARP	-0.240896	(-0.45 , -0.03)	0.0324675
WE90.1	PF3D7_1452000	rhoptry neck protein 2	-0.240701	(-0.45 , -0.02)	0.0326129
#10-G4	PF3D7_1453700	HSP90 co-chaperone p23	-0.240179	(-0.44 , -0.01)	0.0330031
#1-G9	PF3D7_0817600	conserved protein, unknown function	-0.239828	(-0.46 , -0.03)	0.0332682
T01D02	PF3D7_1364900	ferrochelatase	-0.239639	(-0.44 , -0.03)	0.0334111
#4-A3	PF3D7_0516400	phosducin-like protein 1, putative	-0.239619	(-0.43 , -0.03)	0.0334263
WE92.3	PF3D7_1252100	rhoptry neck protein 3	-0.239452	(-0.47 , -0.01)	0.0335538
#10-G2	PF3D7_0804000	cactin homolog, putative	-0.238876	(-0.43 , -0.03)	0.0339954
#12-F11	PF3D7_1201900	conserved protein, unknown function	-0.238573	(-0.47 , -0.01)	0.0342289
#12-H5	PF3D7_0825400	ATP synthase-associated protein, putative	-0.238122	(-0.43 , -0.03)	0.0345803
T01A04	PF3D7_1208300	acyl carrier protein, mitochondrial	-0.23801	(-0.44 , -0.03)	0.0346676
EH21	PF3D7_1361500	PH domain-containing protein, putative	-0.237775	(-0.44 , -0.02)	0.0348526
#10-H11	PF3D7_1138600	beta-catenin-like protein 1, putative	-0.237554	(-0.44 , -0.02)	0.0350271
#10-D4	PF3D7_1244000	glucose inhibited division protein a homologue, putative	-0.237465	(-0.41 , -0.04)	0.0350973
EH31	PF3D7_0930300	merozoite surface protein 1	-0.237417	(-0.43 , -0.03)	0.0351354
#2-D5	PF3D7_0410800	apicomplexan kinetochore protein 3, putative	-0.237041	(-0.44 , -0.02)	0.0354343
#2-H6	PF3D7_1467100	DNA-3-methyladenine glycosylase	-0.236837	(-0.42 , -0.03)	0.0355969
EH34	PF3D7_1030200	claudin-like apicomplexan microneme protein, putative	-0.236561	(-0.45 , -0.02)	0.0358185
#8-F5	PF3D7_1428900	conserved Plasmodium protein, unknown function	-0.236272	(-0.43 , -0.02)	0.036052
EH32	PF3D7_0201700	DnaJ protein, putative	-0.2361	(-0.43 , -0.02)	0.0361915
#10-D3	PF3D7_0410300	protein phosphatase PPM1, putative	-0.236028	(-0.43 , -0.02)	0.0362503
EH25	PF3D7_0920700	CRAL/TRIO domain-containing protein, putative	-0.23601	(-0.43 , -0.03)	0.0362647
#10-G12	PF3D7_0510200	peptidyl-prolyl cis-trans isomerase	-0.235573	(-0.44 , -0.01)	0.0366216
#5-C12	PF3D7_0811300	CCR4-associated factor 1	-0.234849	(-0.44 , 0.01)	0.0372196
#13-H2	PF3D7_1216500	male development gene 1	-0.234652	(-0.44 , -0.01)	0.0373841
#5-G4	PF3D7_0815500	conserved Plasmodium protein, unknown function	-0.234198	(-0.43 , -0.01)	0.0377643
#12-C3	PF3D7_0913700	conserved protein, unknown function	-0.233461	(-0.43 , -0.02)	0.0383884
#4-B10	PF3D7_0823600	lipoate-protein ligase B	-0.233461	(-0.42 , -0.01)	0.0383888
#3-A6	PF3D7_1212700	eukaryotic translation initiation factor 3 subunit A, putative	-0.232811	(-0.44 , -0.03)	0.0389469
#2-H5	PF3D7_0624200	SURP domain-containing protein, putative	-0.232413	(-0.42 , -0.04)	0.0392916
#2-H11	PF3D7_1429100	ribosomal protein L15, apicoplast, putative	-0.232025	(-0.45 , -0.01)	0.0396303
#13-A10	PF3D7_0212100	conserved Plasmodium protein, unknown function	-0.230956	(-0.43 , -0.02)	0.0405762
#2-F5	PF3D7_1405500	COBW domain-containing protein 1, putative	-0.23072	(-0.42 , -0.02)	0.0407868
#10-G6	PF3D7_0713700	conserved Plasmodium protein, unknown function	-0.230598	(-0.43 , -0.03)	0.0408971
TBV_4	PF3D7_0209000	6-cysteine protein P230	-0.229985	(-0.44 , -0.02)	0.0414511
H10-5	PF3D7_1107800	AP2 domain transcription factor, putative	-0.229703	(-0.42 , -0.01)	0.0417083
#12-E4	PF3D7_0208400	histidine phosphatase, putative	-0.229684	(-0.42 , -0.02)	0.0417258
#10-C4	PF3D7_1465900	40S ribosomal protein S3	-0.229517	(-0.42 , -0.03)	0.0418782
#10-D11	PF3D7_0603400	trophozoite exported protein 1	-0.22937	(-0.44 , -0.02)	0.042014
#4-D9	PF3D7_0515700	glideosome-associated protein 40	-0.22926	(-0.41 , -0.00)	0.0421147
EH24	PF3D7_1141800	EELM2 domain-containing protein, putative	-0.229046	(-0.43 , -0.03)	0.0423125
#1-D5	PF3D7_0631100	Plasmodium exported protein (PHISTb), unknown function	-0.228779	(-0.44 , -0.02)	0.0425603
#9-D2	PF3D7_1141300	apical polar ring protein APR1, putative	-0.228753	(-0.40 , -0.03)	0.0425843
#5-B9	PF3D7_0807700	serine protease DegP	-0.228681	(-0.43 , -0.01)	0.0426512
TBV_3-4	PF3D7_0209000	6-cysteine protein P230	-0.228574	(-0.43 , -0.01)	0.0427505
#12-G3	PF3D7_1317900	nucleolar complex protein 4, putative	-0.228063	(-0.44 , -0.01)	0.0432297
#12-A5	PF3D7_0110700	chromatin assembly factor 1 subunit C, putative	-0.22799	(-0.41 , -0.02)	0.0432986
#5-F5	PF3D7_1428300	proliferation-associated protein 2g4, putative	-0.227973	(-0.43 , -0.02)	0.0433144
#8-G4	PF3D7_0830400	CRA domain-containing protein, putative	-0.227638	(-0.42 , -0.02)	0.0436312
#12-F8	PF3D7_1026800	40S ribosomal protein S2	-0.227603	(-0.41 , -0.03)	0.0436644
#2-H7	PF3D7_0305500	protein dopey homolog, putative	-0.227361	(-0.43 , -0.00)	0.0438948
TBV_7-8	PF3D7_0209000	6-cysteine protein P230	-0.227357	(-0.42 , -0.03)	0.0438991
#12-A9	PF3D7_1102500	gametocyte exported protein 2	-0.227161	(-0.44 , -0.00)	0.0440857
#10-B3	PF3D7_0513300	purine nucleoside phosphorylase	-0.226694	(-0.42 , -0.03)	0.0445347
#5-A10	PF3D7_1468400	C3H1-type zinc finger protein CZIF1	-0.226551	(-0.42 , -0.01)	0.0446731
#1-G4	PF3D7_1011900	heme oxygenase	-0.226542	(-0.43 , -0.01)	0.0446817
#5-H3	PF3D7_0110500	bromodomain protein 3, putative	-0.225841	(-0.42 , -0.01)	0.0453639
#1-A3	PF3D7_0220200	Plasmodium exported protein, unknown function	-0.225763	(-0.44 , -0.00)	0.0454414
#12-C1	PF3D7_1331700	glutamine--tRNA ligase, putative	-0.22576	(-0.43 , -0.03)	0.0454437
#12-E2	PF3D7_0926600	conserved Plasmodium membrane protein, unknown function	-0.225301	(-0.43 , -0.01)	0.0458956
#12-A7	PF3D7_1036900	conserved Plasmodium protein, unknown function	-0.225172	(-0.43 , -0.02)	0.0460235
#10-C12	PF3D7_1414000	26S proteasome regulatory subunit RPN13, putative	-0.225025	(-0.43 , -0.01)	0.0461702
#10-B7	PF3D7_0209800	ATP-dependent RNA helicase UAP56	-0.224785	(-0.41 , -0.01)	0.0464093
#3-D1	PF3D7_0813700	ABC transporter F family member 1	-0.22454	(-0.44 , -0.03)	0.0466546
TBV_1-4	PF3D7_0209000	6-cysteine protein P230	-0.2243	(-0.42 , 0.00)	0.0468954
#10-C11	PF3D7_1311800	M1-family alanyl aminopeptidase	-0.223819	(-0.44 , -0.00)	0.0473813
#2-A5	PF3D7_0109200	cleavage and polyadenylation specificity factor subunit 5, putative	-0.223295	(-0.44 , -0.01)	0.047917
#9-C10	PF3D7_0103900	parasite-infected erythrocyte surface protein	-0.223274	(-0.41 , -0.01)	0.0479382
EH1	PF3D7_1410400	rhoptry-associated protein 1	-0.223202	(-0.44 , -0.01)	0.0480121
#5-C11	PF3D7_0933500	gamma-tubulin complex component, putative	-0.221983	(-0.41 , -0.03)	0.0492777
#5-A1	PF3D7_1213800	proline--tRNA ligase	-0.221942	(-0.42 , 0.01)	0.0493207
#5-E4	PF3D7_1038100	GDP dissociation inhibitor, putative	-0.221657	(-0.43 , -0.02)	0.0496207
#8-F6	PF3D7_0618300	60S ribosomal protein L27a, putative	-0.221533	(-0.43 , 0.01)	0.0497515
WE69	PF3D7_1250200	CSC1-like protein, putative	-0.221445	(-0.43 , 0.00)	0.0498446
#5-F7	PF3D7_1367500	NADH-cytochrome b5 reductase, putative	-0.221326	(-0.41 , -0.01)	0.04997
